# Supplementary material for: Ecological Consistency of SSU rRNA-Based Operational Taxonomic Units at a Global Scale
Source: PubMed Central journal article supplement (PMC3998914; doi:10.1371/journal.pcbi.1003594), 2014-04-24

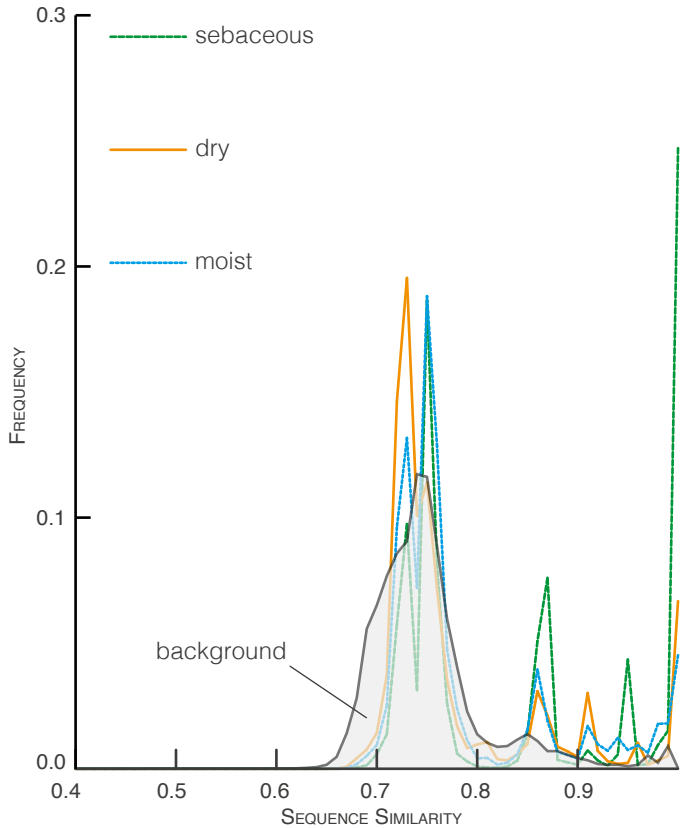

Supplement: pcbi.1003594.s002.pdf [file pcbi.1003594.s002.pdf]
